# Supplementary figures and images for: Crystal engineering a linear polymer of C60 fullerene via supramolecular pre-organization
Source: Royal Society of Chemistry journal article supplement (doi:10.1039/b007116l), 2000-01-01

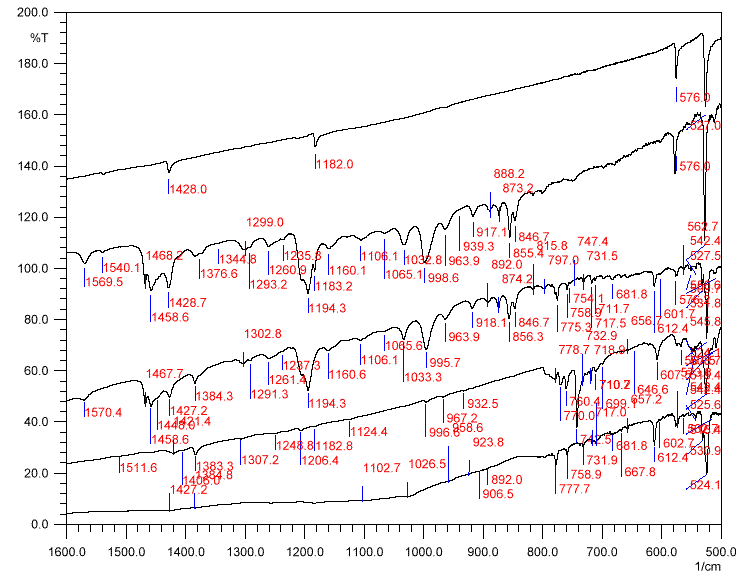


**a**

**b**

**c**

**d**

**e**

**Enlarged version of Fig. 3 showing peak frequencies**

Supplement: b007116ls1.doc [file b007116ls1.doc]
